# Supplementary material
Source: PubMed Central journal article supplement (PMC2929061)

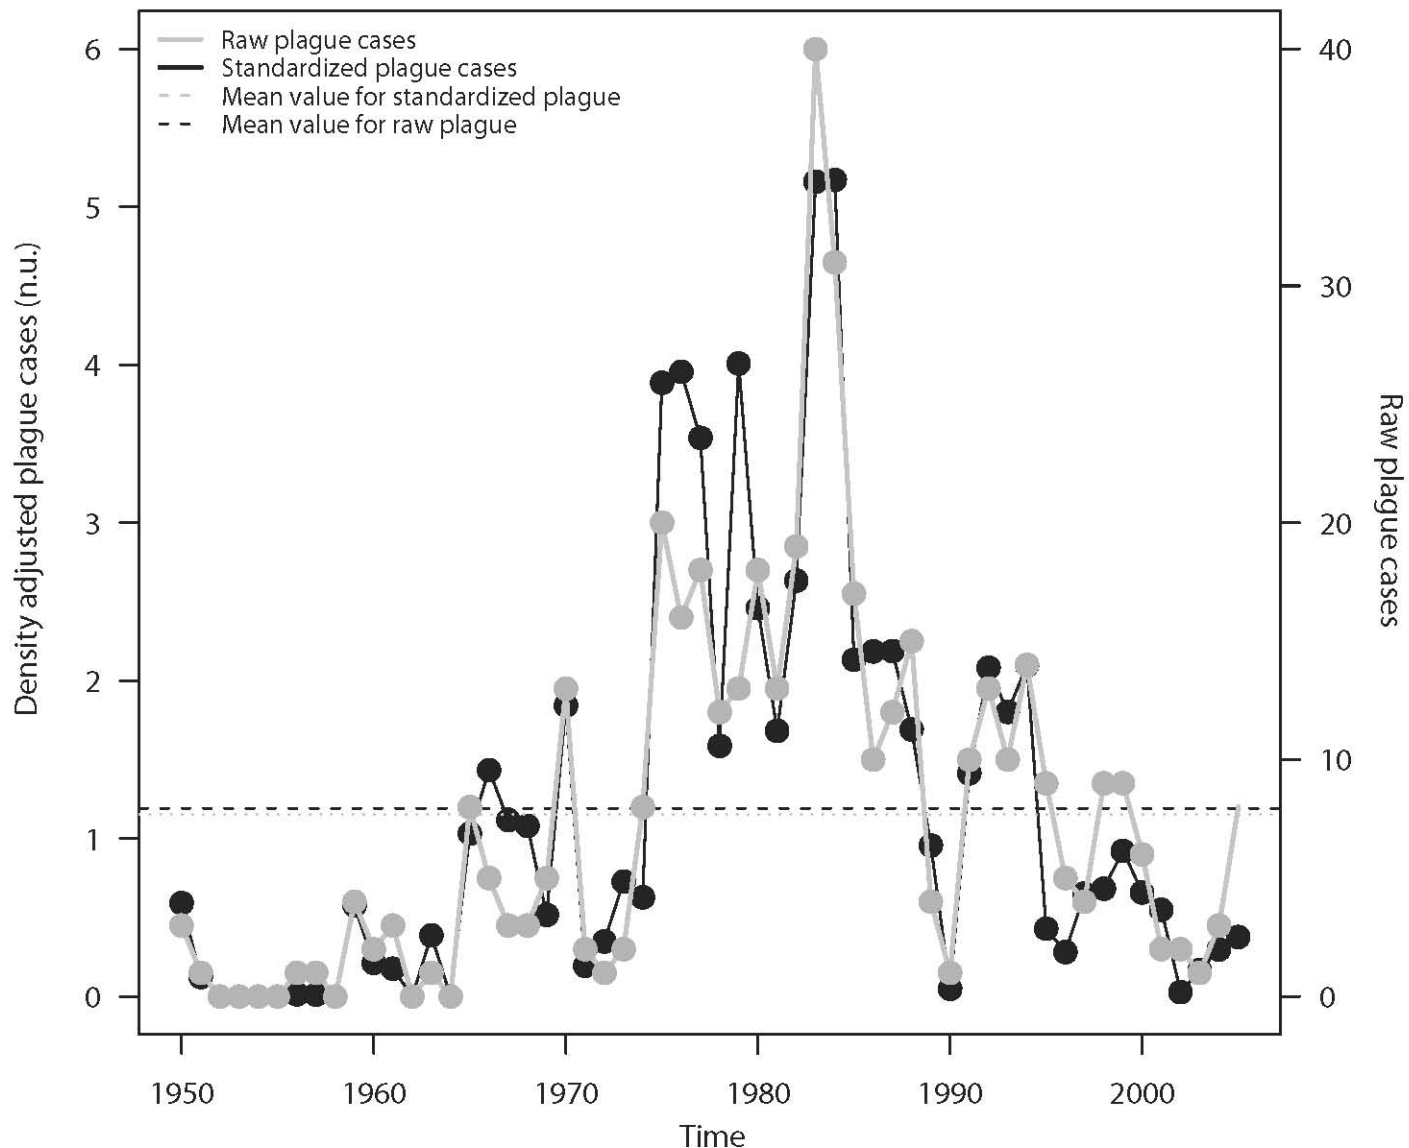

Supplement: supp_83_3_624__1.pdf [file supp_83_3_624__1.pdf]

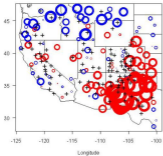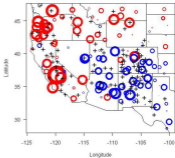

Supplement: supp_83_3_624__2.pdf [file supp_83_3_624__2.pdf]

**1950 - 59**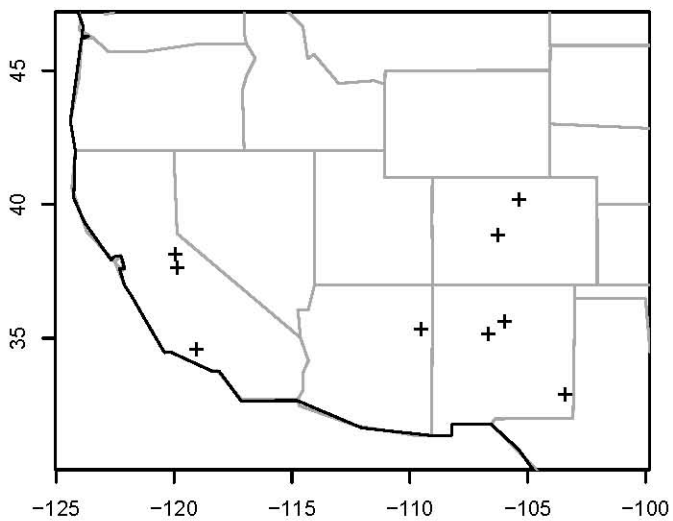**1960 - 69**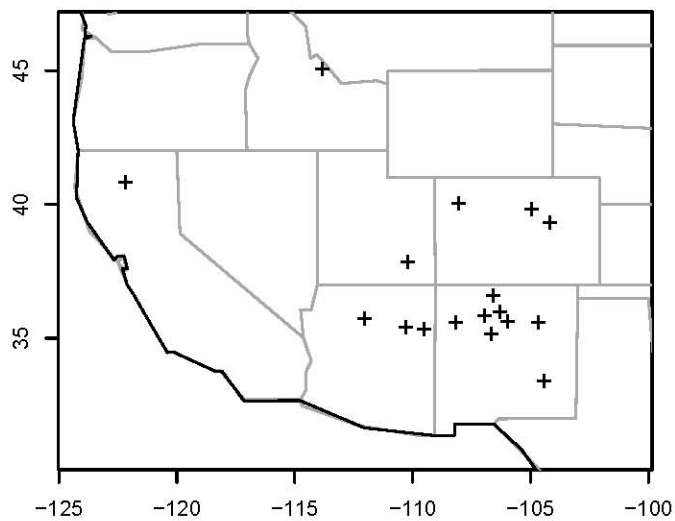**1970 - 79**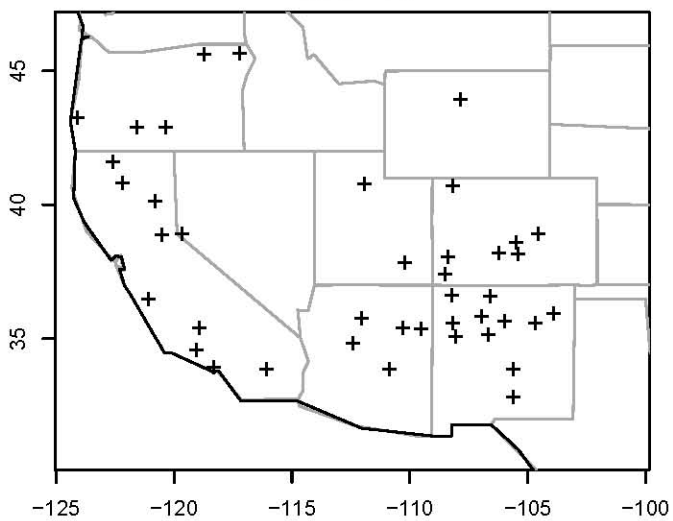**1980 - 89**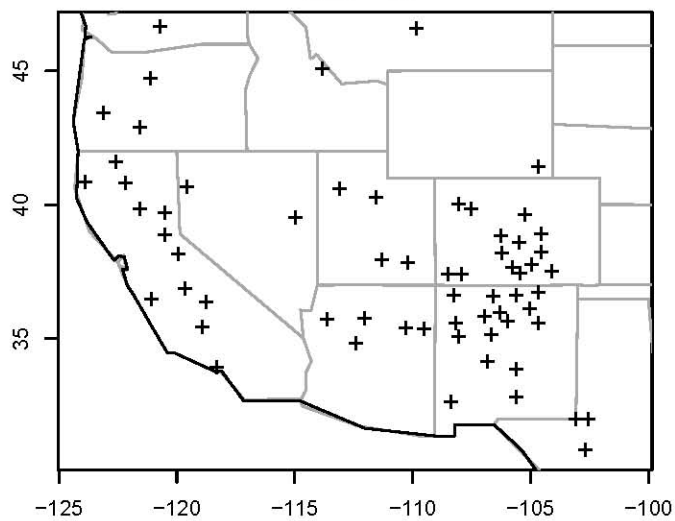**1990 - 99**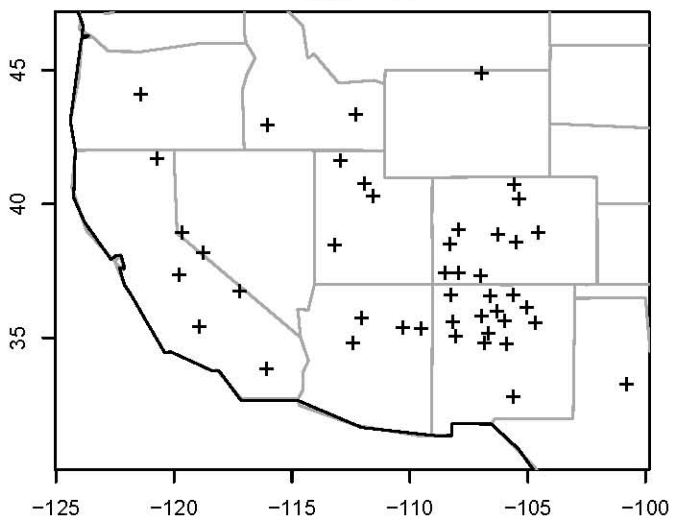**2000 - 2005**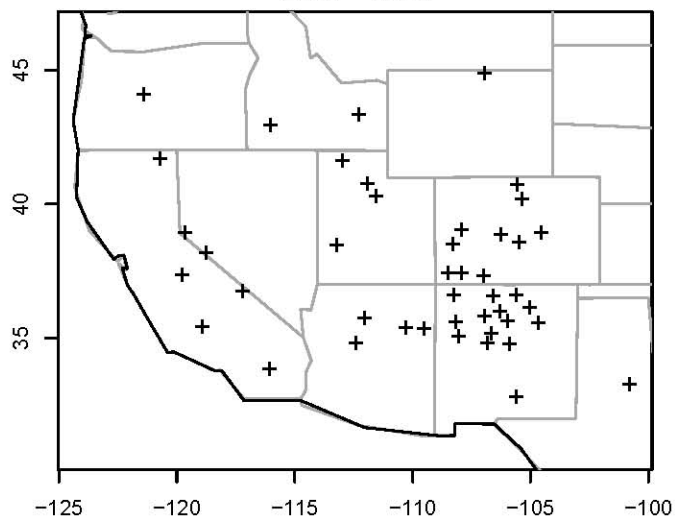

Supplement: supp_83_3_624__3.pdf [file supp_83_3_624__3.pdf]

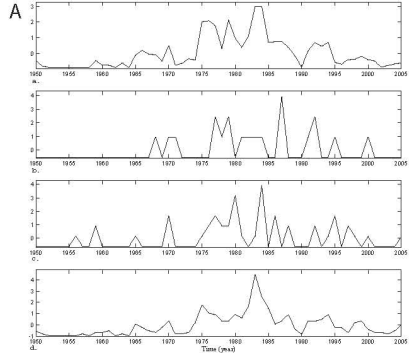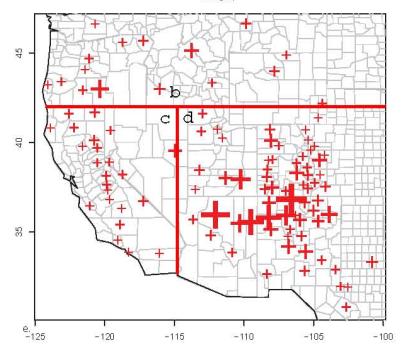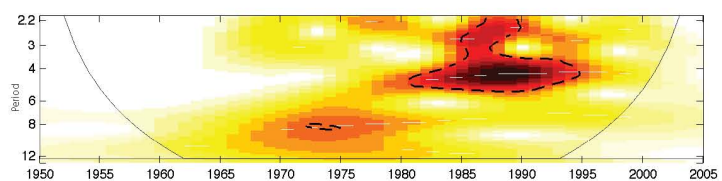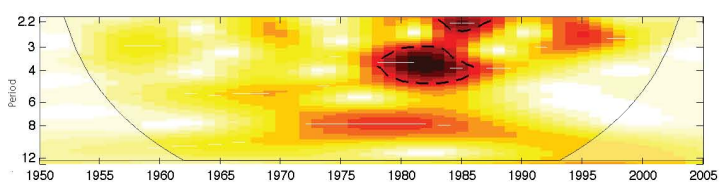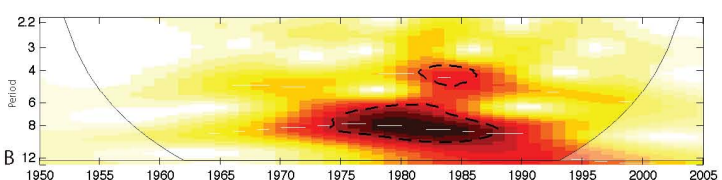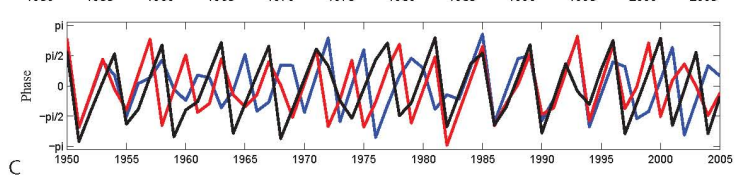

Supplement: supp_83_3_624__4.pdf [file supp_83_3_624__4.pdf]

Elevation (m)

Latitude ( $^{\circ}$ N)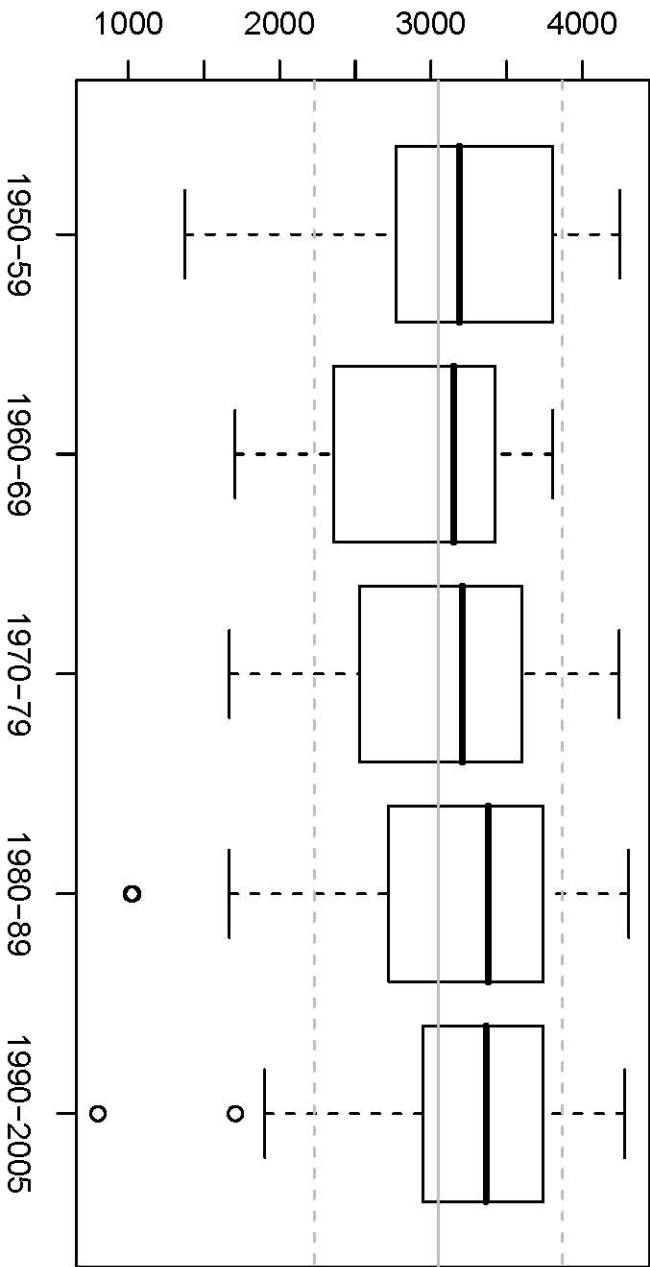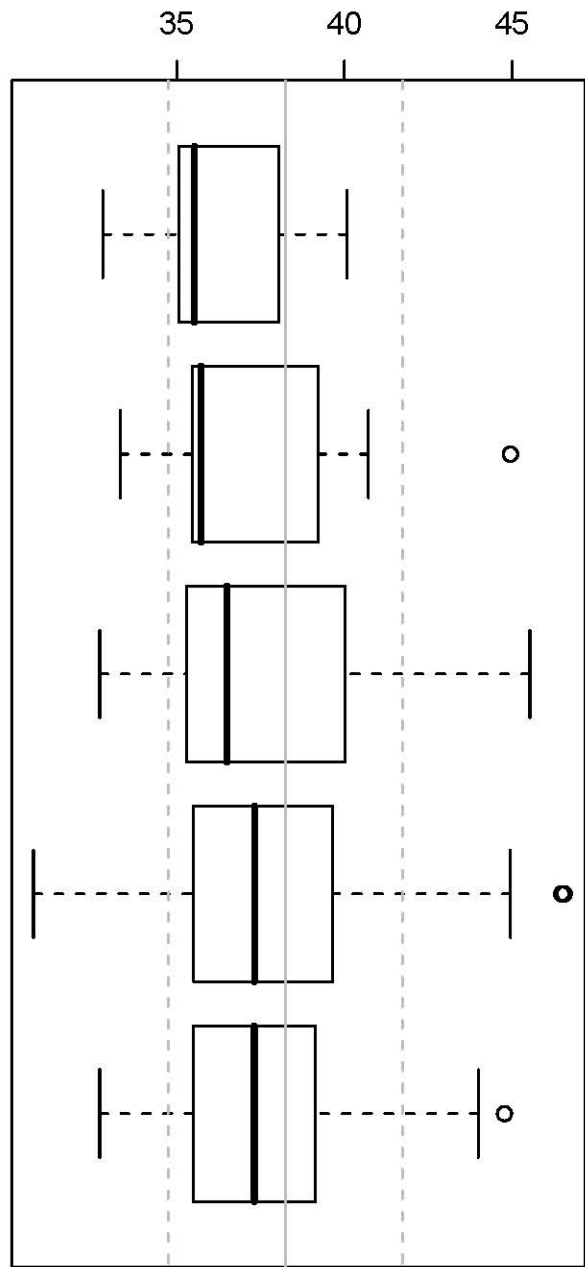

Supplement: supp_83_3_624__5.pdf [file supp_83_3_624__5.pdf]

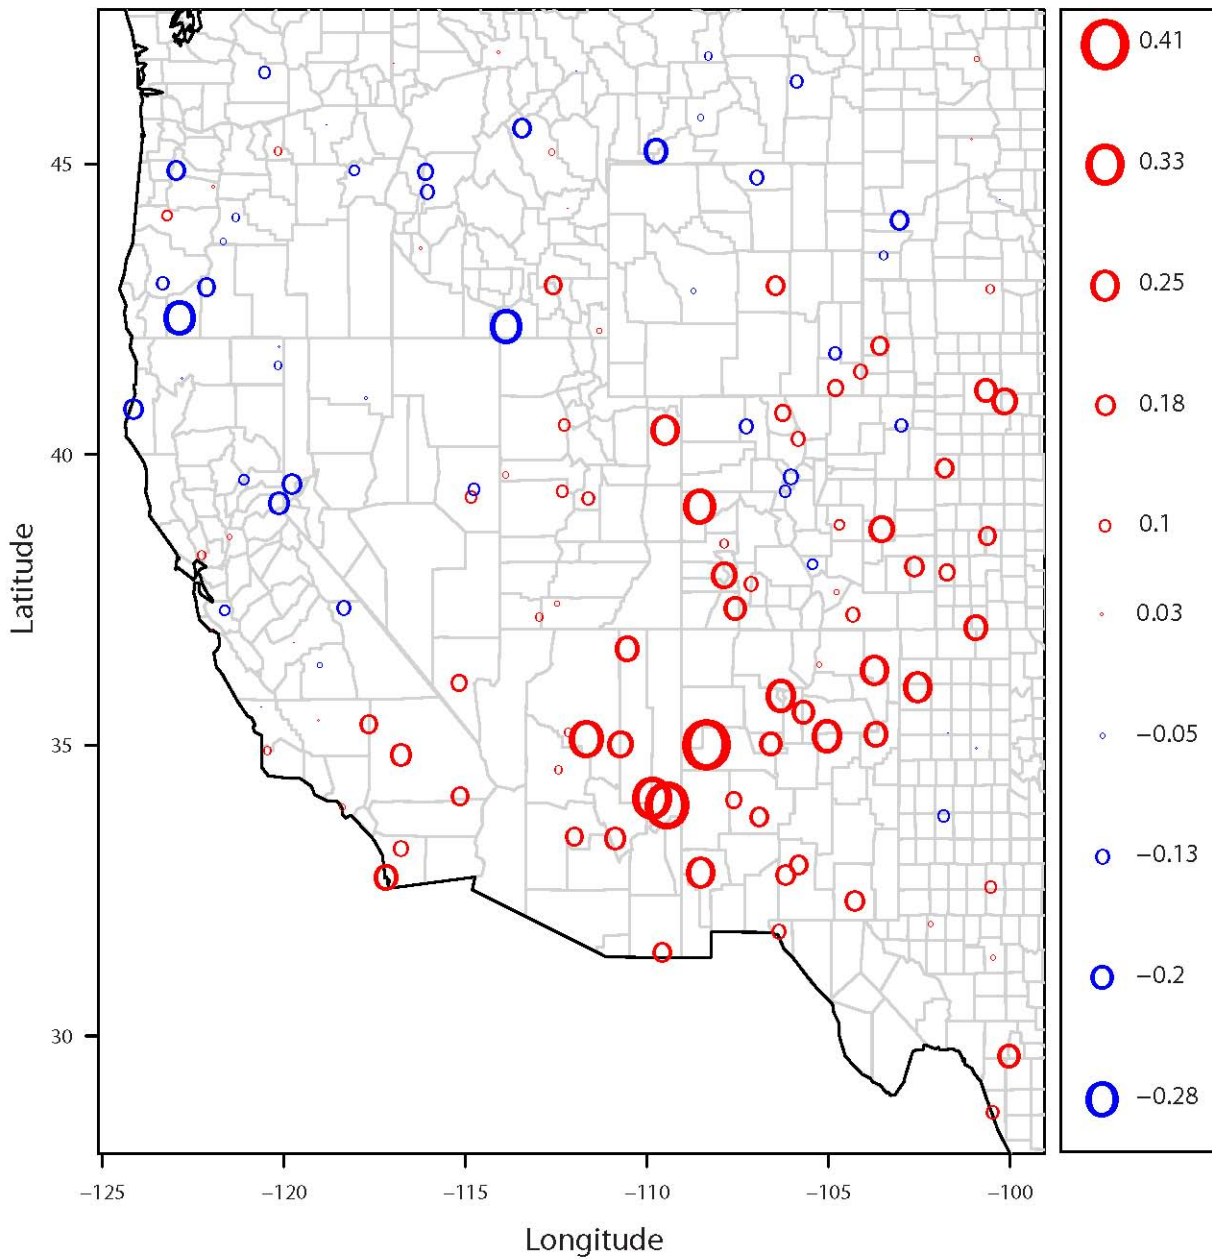

Supplement: supp_83_3_624__6.pdf [file supp_83_3_624__6.pdf]
